# Supplementary material
Source: publisher site journal article supplement (https://www.spandidos-publications.com/5598/downloadSupplementary)
Supplement: Supplementary file 1 [file downloadSupplementary]

## Sheet: pathway_results
Table SI. Eniched signaling pathways of differentially expressed metabolites in optic nerve transection retina.
Pathway	Total Cmpd	Hits	Raw p	-LOG10(p)	Holm adjust	FDR	Impact
D-Arginine and D-ornithine metabolism	4	1	4.0893e-12	11.388	2.0446e-10	2.0446e-10	0
Primary bile acid biosynthesis	46	3	3.8013e-09	8.4201	1.8626e-07	9.5033e-08	0.06809
Biosynthesis of unsaturated fatty acids	36	3	1.7564e-07	6.7554	8.4307e-06	2.9273e-06	0
Fructose and mannose metabolism	18	2	2.927e-07	6.5336	1.3757e-05	3.6587e-06	0.15735
Valine, leucine and isoleucine degradation	40	1	4.3928e-07	6.3573	2.0207e-05	3.6607e-06	0
Valine, leucine and isoleucine biosynthesis	8	1	4.3928e-07	6.3573	2.0207e-05	3.6607e-06	0
Pentose phosphate pathway	22	4	5.8361e-07	6.2339	2.5679e-05	4.1687e-06	0.16649
Sphingolipid metabolism	21	2	9.6421e-07	6.0158	4.1461e-05	5.9047e-06	0.08316
beta-Alanine metabolism	21	3	1.151e-06	5.9389	4.8341e-05	5.9047e-06	0.05597
Arginine and proline metabolism	38	4	1.2747e-06	5.8946	5.2262e-05	5.9047e-06	0.01212
Riboflavin metabolism	4	2	1.299e-06	5.8864	5.2262e-05	5.9047e-06	0.5
Aminoacyl-tRNA biosynthesis	48	3	2.3085e-06	5.6367	9.0032e-05	9.6188e-06	0
Caffeine metabolism	12	1	2.6836e-06	5.5713	0.00010198	1.0321e-05	0
Arginine biosynthesis	14	2	3.8224e-06	5.4177	0.00014143	1.3651e-05	0.22843
Glycine, serine and threonine metabolism	34	1	4.222e-06	5.3745	0.00015199	1.4073e-05	0
Lysine degradation	25	1	9.7002e-06	5.0132	0.00033951	2.9993e-05	0
Steroid hormone biosynthesis	77	2	1.0198e-05	4.9915	0.00034672	2.9993e-05	0.05404
Phenylalanine, tyrosine and tryptophan biosynthesis	4	1	1.6591e-05	4.7801	0.0005475	3.9502e-05	0.5
Tyrosine metabolism	42	1	1.6591e-05	4.7801	0.0005475	3.9502e-05	0.13972
Ubiquinone and other terpenoid-quinone biosynthesis	9	1	1.6591e-05	4.7801	0.0005475	3.9502e-05	0
Phenylalanine metabolism	12	1	1.6591e-05	4.7801	0.0005475	3.9502e-05	0
Pentose and glucuronate interconversions	18	2	2.7297e-05	4.5639	0.00079162	6.204e-05	0.26562
Cysteine and methionine metabolism	33	2	3.2082e-05	4.4937	0.00089831	6.9745e-05	0.0793
Thiamine metabolism	7	1	3.9391e-05	4.4046	0.0010636	8.2065e-05	0
D-Glutamine and D-glutamate metabolism	6	1	8.3214e-05	4.0798	0.0021636	0.00016643	0
Ether lipid metabolism	20	1	9.2364e-05	4.0345	0.0023091	0.000174	0
Glycerophospholipid metabolism	36	7	9.3962e-05	4.027	0.0023091	0.000174	0.31558
Alanine, aspartate and glutamate metabolism	28	5	0.00016343	3.7867	0.0037589	0.00029184	0.35818
Ascorbate and aldarate metabolism	10	1	0.00020439	3.6895	0.0044966	0.00034065	0.25
Inositol phosphate metabolism	30	1	0.00020439	3.6895	0.0044966	0.00034065	0
Galactose metabolism	27	1	0.00044005	3.3565	0.0088009	0.00070975	0.03235
Tryptophan metabolism	41	1	0.00049323	3.307	0.0093713	0.00077067	0.03901
Glutathione metabolism	28	4	0.001034	2.9855	0.018613	0.0015667	0.33974
Amino sugar and nucleotide sugar metabolism	37	4	0.0012666	2.8973	0.021533	0.0018627	0.16748
Purine metabolism	66	12	0.0015389	2.8128	0.024622	0.0021984	0.19609
Retinol metabolism	16	2	0.0017665	2.7529	0.026498	0.0024535	0.00599
Arachidonic acid metabolism	36	2	0.0021006	2.6777	0.029408	0.0028386	0.33292
Histidine metabolism	16	1	0.0022458	2.6486	0.029408	0.0029549	0
Linoleic acid metabolism	5	1	0.0032895	2.4829	0.039475	0.0041119	0
alpha-Linolenic acid metabolism	13	1	0.0032895	2.4829	0.039475	0.0041119	0
Biotin metabolism	10	1	0.0043523	2.3613	0.043523	0.0053077	0.15
Glyoxylate and dicarboxylate metabolism	32	2	0.0051195	2.2908	0.046075	0.0060946	0.03175
Taurine and hypotaurine metabolism	8	2	0.0057604	2.2395	0.046083	0.0066982	0.42857
Pantothenate and CoA biosynthesis	19	7	0.0074208	2.1295	0.051946	0.0084185	0.33928
Vitamin B6 metabolism	9	1	0.0075767	2.1205	0.051946	0.0084185	0
Citrate cycle (TCA cycle)	20	1	0.0082956	2.0812	0.051946	0.009017	0.09038
Pyrimidine metabolism	39	8	0.023791	1.6236	0.095164	0.025205	0.35656
Nicotinate and nicotinamide metabolism	15	3	0.024197	1.6162	0.095164	0.025205	0.42895
Glycosylphosphatidylinositol (GPI)-anchor biosynthesis	14	1	0.057333	1.2416	0.11467	0.058503	0.00399
Glycolysis / Gluconeogenesis	26	1	0.073714	1.1324	0.11467	0.073714	0.00021
